# Supplementary material
Source: PubMed Central journal article supplement (PMC4043279)
Supplement: NIHMS583642-supplement-Supplementary_Material.pdf [file NIHMS583642-supplement-Supplementary_Material.pdf]

**Supplementary Material**

In this section we will prove that under a special case of the null hypothesis the test statistic (5) with scoring function  $S_i(t) = \pm 1$  given in (7) has an asymptotic normal distribution. To show this we will use several theorems and definitions from Fleming and Harrington [10]. Let  $\lambda_i(t)$  be the hazard rate for species  $i$  at time  $t$ . We shall assume a strong version of our null hypothesis given by

$$H_0 : \lambda_i(t) = \lambda(t) \text{ for } i = 1, \dots, n \text{ and } \forall t \in R^+ \tag{22}$$

This amounts to assuming that there are no age effects (the Red Queen hypothesis) or covariate effects on species extinction. I will prove that:

$$\frac{J}{\sqrt{V}} \xrightarrow{D} N(0, 1) \tag{23}$$

This will be shown by applying a martingale central limit theorem to statistic  $J$  [10]. Using the univariate case of theorem 5.3.4 of Fleming and Harrington we have the following central limit theorem:

**THEOREM 6.1** *Let  $W$  be a Brownian motion process and  $f$  be a measurable nonnegative function such that  $\alpha(t) = \int_0^t f^2(s)ds < \infty, \forall t > 0$ . Suppose,*

- (1)  $\{N_i(t) : i = 1, \dots, n\}$  is a counting process with stochastic basis  $(\Omega, \mathcal{F}, \{\mathcal{F}_t : t > 0\}, P)$
- (2) The compensator  $A_i(t)$  of  $N_i(t)$  is continuous.
- (3)  $H_i(t)$  is a locally bounded  $\mathcal{F}_t$ -predictable process.

Define

$$M_i(t) \equiv N_i(t) - A_i(t), \tag{24}$$

$$U_i(t) = \int_0^t H_i(s)dM_i(s), \quad U(t) = \sum_{i=1}^n U_i(t), \tag{25}$$

and for any  $\epsilon > 0$

$$U_{i,\epsilon}(t) = \int_0^t H_i(s)I_{\{|H_i(s)| \geq \epsilon\}}dM_i(s),$$

$$U_\epsilon(t) = \sum_{i=1}^n U_{i,\epsilon}(t).$$

Assume for any  $t \in [0, \eta]$  as  $n \rightarrow \infty$

- i.  $\langle U, U \rangle(t) \xrightarrow{P} \int_0^t f^2(s)ds$   
and
- ii.  $\langle U_\epsilon, U_\epsilon \rangle(t) \xrightarrow{P} 0$  for any  $\epsilon > 0$

Then  $U \xrightarrow{D} \int f dW$  in  $D[0, \eta]$  as  $n \rightarrow \infty$ .

**Proof of (23):**

Before showing that *i.* and *ii.* hold, I will show conditions 1-3 for the situation of our statistic  $J$ :

- (1) Show  $N_i(t)$  is a counting process.

The relevant definitions are:

**DEFINITION 6.2** A counting process is a stochastic process  $\{N(t) : t > 0\}$  adapted to a filtration  $\{\mathcal{F}_t : t > 0\}$  with  $N(0) = 0$  and  $N(t) < \infty$  a.s. and whose paths are with probability one right-continuous, piecewise constant, and have only jump discontinuities, with jumps of size  $+1$ .

**DEFINITION 6.3** A stochastic process  $\{X(t) : t \geq 0\}$  is adapted to a filtration if, for every  $t \geq 0$ ,  $X(t)$  is  $\mathcal{F}_t$ -measurable, i.e.,  $\{\omega : X(t, \omega) \leq x\} \in \mathcal{F}_t$ .

In our situation

$$N_i(t) = I_{\{R_i \leq t\}} = \begin{cases} 0, & t < R_i \\ 1, & t \geq R_i \end{cases} \quad (26)$$

where  $R_i > 0$ . This clearly satisfies  $N(0) = 0$  and  $N(t) < \infty$ , and has paths which are right-continuous and piecewise constant, with a single jump of size 1. The filtration we use throughout this work is

$$\mathcal{F}_t = \sigma \{N_i(u), N_i^L(u) : 0 \leq u \leq t\}, \text{ where } N_i^L(u) = I_{\{L_i \leq u\}}. \quad (27)$$

Since  $N_i(t) \in \{N_i(u), N_i^L(u) : 0 \leq u \leq t\}$ , it is clear that  $N_i(t)$  is  $\mathcal{F}_t$ -measurable.

- (2) Now I will show that the continuous compensator of  $N_i(t)$  is  $A_i(t) \equiv \int_{\gamma}^t Y_i(u) \lambda_i(u) du$ , that is  $A_i(t)$  is increasing, continuous and  $\mathcal{F}_t$ -predictable and  $M_i(t) = N_i(t) - A_i(t)$  is an  $\mathcal{F}_t$ -martingale, where

$$\lambda_i(t) = \lim_{h \rightarrow 0} \frac{1}{h} P(t < R_i < t + h | L_i < t < R_i). \quad (28)$$

To show this I will need to establish the following:

- a)  $A_i(t)$  is continuous, increasing, and  $\mathcal{F}_t$ -predictable.
- b)  $M_i(t)$  is adapted to  $\mathcal{F}_t$ .
- c)  $E|M_i(t)| < \infty$
- d)  $E(M_i(t+s) | \mathcal{F}_t) = M_i(t)$

- a) Show  $A_i(t)$  is increasing, continuous and  $\mathcal{F}_t$ -predictable.

$A_i(t)$  is continuous and increasing since it is the cumulative integral of a non-negative integrand. Define

$$\Lambda_i(t) = \int_{\gamma}^t \lambda_i(u) du.$$

$A_i(t)$  is adapted since

$$A_i(t) = \int_{\gamma}^t I(L_i < u \leq R_i) \lambda_i(u) du = \Lambda_i(t \wedge R_i) - \Lambda_i(t \wedge L_i)$$

and both  $t \wedge R_i$  and  $t \wedge L_i$  are easily seen to be adapted. Now, since  $A_i(t)$  is continuous and adapted, we conclude (from Lemma 1.4.1 of Fleming and Harrington) that  $A_i(t)$  is predictable.

- b) Show  $M_i(t)$  is adapted to  $\mathcal{F}_t$ .

It suffices to show that  $N_i(t)$  and  $A_i(t)$  are adapted to  $\mathcal{F}_t$ , but these were shown earlier.

c) Show  $E|M_i(t)| < \infty$ .

$$\begin{aligned} E|M_i(t)| &\leq E(N_i(t)) + E \int_{\gamma}^t Y_i(u)\lambda_i(u)du \\ &\leq 1 + \int_{\gamma}^t P(L_i < u \leq R_i)\lambda_i(u)du \\ &\leq 1 + \int_{\gamma}^t \lambda_i(u)du \\ &< \infty \end{aligned}$$

d) Show  $E(M_i(t+s)|\mathcal{F}_t) = M_i(t)$  a.s.  $\forall s, t \geq 0$ .

$$\begin{aligned} E(M_i(t+s)|\mathcal{F}_t) &= E \left\{ N_i(t+s) - \int_{\gamma}^{t+s} Y_i(u)\lambda_i(u)du | \mathcal{F}_t \right\} \\ &= N_i(t) - \int_{\gamma}^t Y_i(u)\lambda_i(u)du + E \{ N_i(t+s) - N_i(t) | \mathcal{F}_t \} \\ &\quad - E \left\{ \int_t^{t+s} Y_i(u)\lambda_i(u)du | \mathcal{F}_t \right\} \\ &= M_i(t) + E \{ N_i(t+s) - N_i(t) | \mathcal{F}_t \} - E \left\{ \int_t^{t+s} Y_i(u)\lambda_i(u)du | \mathcal{F}_t \right\} \end{aligned}$$

Thus it suffices to show that

$$E \{ N_i(t+s) - N_i(t) | \mathcal{F}_t \} = E \left\{ \int_t^{t+s} Y_i(u)\lambda_i(u)du | \mathcal{F}_t \right\} \quad (29)$$

For the remainder of the proof we will suppress the use of  $i$  in the notation. Let us start by noting that  $\mathcal{F}_t = \sigma \{L^{(t)}, R^{(t)}\}$  where

$$L^{(t)} = \begin{cases} L, & L \leq t \\ \infty, & L > t \end{cases}$$

$$R^{(t)} = \begin{cases} R, & R \leq t \\ \infty, & R > t \end{cases}$$

Removing the  $i$  notation from the left hand side of the equation (29) we have:

$$\begin{aligned} E(N(t+s) - N(t)|\mathcal{F}_t) &= P(t < R \leq t+s | \mathcal{F}_t) \\ &= E(I_{\{t < R \leq t+s\}} | \mathcal{F}_t) \\ &= \begin{cases} 0, & \text{if } R \leq t \\ P(t < R \leq t+s | L > t), & \text{if } L > t \\ 1 - e^{-\int_t^{t+s} \lambda(u)du}, & \text{if } L \leq t < R \end{cases} \end{aligned} \quad (30)$$

When  $L > t$  equation (30) follows from  $\{\omega : L(\omega) > t\} = \{\omega : L^{(t)}(\omega) = R^{(t)}(\omega) = \infty\}$ .

Now we will evaluate the right hand side of equation (29) and show that it is equal to the left.

$$E\left(\int_t^{t+s} Y(u)\lambda(u)du|\mathcal{F}_t\right) = \int_t^{t+s} E(Y(u)|\mathcal{F}_t)\lambda(u)du \quad (31)$$

For  $t < u < t + s$ , let's consider equation (31) on the 3 sets:  $\{R \leq t\}$ ,  $\{L > t\}$ , and  $\{L \leq t < R\}$ . By definition we know that

$$E(Y(u)|\mathcal{F}_t) = P(L < u \leq R|\mathcal{F}_t).$$

For  $\omega \in \{R \leq t\}$ ,  $P(L < u \leq R|\mathcal{F}_t) = 0$ . Thus,

$$\int_t^{t+s} E(Y(u)|\mathcal{F}_t)\lambda(u)du = 0 \quad (32)$$

on  $\{R \leq t\}$ . For  $\omega \in \{L \leq t < R\}$ ,

$$P(L < u \leq R|\mathcal{F}_t) = P(R \geq u|L, R > t) = e^{-\int_t^u \lambda(z)dz}.$$

Thus, if  $L \leq t < R$ ,

$$\begin{aligned} \int_t^{t+s} E(Y(u)|\mathcal{F}_t)\lambda(u)du &= \int_t^{t+s} e^{-\int_t^u \lambda(z)dz}\lambda(u)du \\ &= -e^{-\int_t^u \lambda(z)dz}\Big|_{u=t}^{u=t+s} \\ &= 1 - e^{-\int_t^{t+s} \lambda(z)dz} \end{aligned} \quad (33)$$

For  $\omega \in \{L > t\}$ ,

$$\begin{aligned} E(Y(u)|\mathcal{F}_t) &= P(L < u \leq R|L > t) = P(t < L < u \leq R|L > t) \\ &= \frac{P(t < L < u \leq R)}{P(L > t)} \\ &= \frac{\int_t^u P(R \geq u|L = z)dF_L(z)}{P(L > t)} \\ &= \frac{\int_t^u e^{-\int_z^u \lambda(w)dw}dF_L(z)}{P(L > t)} \end{aligned} \quad (34)$$

Thus by equation (34) we have,

$$\begin{aligned}
 \int_t^{t+s} E(Y(u)|\mathcal{F}_t)\lambda(u)du &= \int_t^{t+s} \lambda(u) \left( \frac{\int_t^u e^{-\int_z^u \lambda(w)dw} dF_L(z)}{P(L > t)} \right) du \\
 &= \frac{1}{P(L > t)} \int_t^{t+s} dF_L(z) \int_z^{t+s} e^{-\int_z^u \lambda(w)dw} \lambda(u)du \\
 &= \frac{\int_t^{t+s} dF_L(z)}{P(L > t)} \left( -e^{-\int_z^u \lambda(w)dw} \Big|_z^{t+s} \right) \\
 &= \frac{\int_t^{t+s} dF_L(z)}{P(L > t)} \left( 1 - e^{-\int_z^{t+s} \lambda(w)dw} \right) \\
 &= \frac{P(R \leq t + s, L > t)}{P(L > t)} \\
 &= P(R \leq t + s | L > t) \\
 &= P(t < R \leq t + s | L > t)
 \end{aligned} \tag{35}$$

Now by equations (31), (32), (33), and (35) we have,

$$\int_t^{t+s} E(Y(u)|\mathcal{F}_t)\lambda(u)du = \begin{cases} 0, & \text{if } R \leq t \\ P(t < R \leq t + s | L > t), & \text{if } L > t \\ 1 - e^{-\int_t^{t+s} \lambda(z)dz}, & \text{if } L \leq t < R \end{cases} \tag{36}$$

This is equivalent to equation (30).

(3) Show that  $H_i(t) = S_i(t)Y_i(t)$  is locally bounded.

We will show this for the particular score function  $S_i(t)$  which takes the values +1 or -1 (7). This score function is actually bounded globally:

$$|H_i(t)| = |S_i(t)Y_i(t)| \leq Y_i(t) \leq 1 \quad \forall t \geq 0 \tag{37}$$

i. Show  $\langle J, J \rangle (t) \xrightarrow{p} \int_0^t f^2(s)ds$ .

Let's first break down Statistic  $J$ .

$$\begin{aligned}
 J(t) &\equiv \frac{1}{\sqrt{n}} \sum_{i=1}^n \int_{\gamma}^t S_i(u) Y_i(u) dN_i(u) \\
 &= \frac{1}{\sqrt{n}} \sum_{i=1}^n \int_{\gamma}^t S_i(u) Y_i(u) dM_i(u) + \frac{1}{\sqrt{n}} \sum_{i=1}^n \int_{\gamma}^t S_i(u) Y_i(u) d\Lambda_i(u) \\
 &= \frac{1}{\sqrt{n}} \sum_{i=1}^n \int_{\gamma}^t S_i(u) Y_i(u) dM_i(u) + \frac{1}{\sqrt{n}} \sum_{i=1}^n \int_{\gamma}^t S_i(u) Y_i(u) \lambda_i(u) du \\
 &= \frac{1}{\sqrt{n}} \sum_{i=1}^n \int_{\gamma}^t S_i(u) Y_i(u) dM_i(u) + \frac{1}{\sqrt{n}} \int_{\gamma}^t \sum_{i=1}^n S_i(u) Y_i(u) \lambda_i(u) du \\
 &= \frac{1}{\sqrt{n}} \sum_{i=1}^n \int_{\gamma}^t S_i(u) Y_i(u) dM_i(u) + \frac{1}{\sqrt{n}} \int_{\gamma}^t \sum_{i=1}^n S_i(u) Y_i(u) \lambda(u) du \quad (\text{by } H_0) \\
 &= \frac{1}{\sqrt{n}} \sum_{i=1}^n \int_{\gamma}^t S_i(u) Y_i(u) dM_i(u) \tag{38}
 \end{aligned}$$

$$\begin{aligned}
 \langle J, J \rangle (t) &= \left\langle \frac{1}{\sqrt{n}} \sum_{i=1}^n \int_{\gamma}^t S_i(u) Y_i(u) dM_i(u), \frac{1}{\sqrt{n}} \sum_{i=1}^n \int_{\gamma}^t S_i(u) Y_i(u) dM_i(u) \right\rangle \\
 &= \frac{1}{n} \sum_{i=1}^n \left\langle \int_{\gamma}^t S_i(u) Y_i(u) dM_i(u), \int_{\gamma}^t S_i(u) Y_i(u) dM_i(u) \right\rangle \\
 &= \frac{1}{n} \sum_{i=1}^n \int_{\gamma}^t S_i^2(u) Y_i(u) d \langle M_i, M_i \rangle (u) \\
 &= \frac{1}{n} \sum_{i=1}^n \int_{\gamma}^t S_i^2(u) Y_i(u) d\Lambda_i(u) \\
 &= \frac{1}{n} \sum_{i=1}^n \int_{\gamma}^t Y_i(u) d\Lambda(u) \quad \text{by (7)} \\
 &= \int_{\gamma}^t \frac{1}{n} \sum_{i=1}^n Y_i(u) \lambda(u) du
 \end{aligned}$$

Now we will show a.s. uniform convergence of  $\frac{1}{n} \sum_{i=1}^n Y_i(u)$ .

$$\frac{1}{n} \sum_{i=1}^n Y_i(u) = \frac{1}{n} \sum_{i=1}^n I_{\{R_i \geq u\}} - \frac{1}{n} \sum_{i=1}^n I_{\{L_i \geq u\}} \xrightarrow{a.s.} \text{uniformly } S_R(u) - S_L(u)$$

as  $n \rightarrow \infty$  by the Glivenko-Cantelli Theorem. Here we are assuming the pairs  $(L_i, R_i)$ ,  $i = 1, \dots, n$  are i.i.d. and denote the survival functions of  $L_i$  and  $R_i$

by  $S_L$  and  $S_R$ , respectively. This implies that

$$\lambda(u) \left( \frac{1}{n} \sum_{i=1}^n Y_i(u) \right) \xrightarrow{\text{a.s. uniformly}} \lambda(u) (S_R(u) - S_L(u)) \text{ as } n \rightarrow \infty. \quad (39)$$

Since

$$\sup_u \left| \left( \frac{1}{n} \sum_{i=1}^n Y_i(u) \right) \lambda(u) - (S_R(u) - S_L(u)) \lambda(u) \right| \xrightarrow{\text{a.s.}} 0,$$

integration leads to

$$\langle J, J \rangle (t) \xrightarrow{\text{a.s.}} \int_{\gamma}^t f^2(u) du$$

for all  $t$  where  $f^2(u) = (S_R(u) - S_L(u))\lambda(u)$ .

$$J_{\epsilon}(t) = \frac{1}{\sqrt{n}} \sum_{i=1}^n \int_{\gamma}^t S_i(u) Y_i(u) I_{\{|S_i(u) Y_i(u) \frac{1}{\sqrt{n}}| > \epsilon\}} dM_i(u)$$

$$\begin{aligned} \langle J_{\epsilon}, J_{\epsilon} \rangle (t) &= \frac{1}{n} \sum_{i=1}^n \int_{\gamma}^t S_i^2(u) I_{\{|S_i(u) Y_i(u) \frac{1}{\sqrt{n}}| > \epsilon\}} d\Lambda(u) \\ &= \frac{1}{n} \sum_{i=1}^n \int_{\gamma}^t I_{\{|\frac{Y_i(u)}{\sqrt{n}}| > \epsilon\}} d\Lambda(u) \\ &= \frac{1}{n} \sum_{i=1}^n \int_{\gamma}^t I_{\{Y_i(u) > \sqrt{n}\epsilon\}} d\Lambda(u) \\ &= 0 \text{ for } n > 1/\epsilon^2. \end{aligned}$$
